# Supplementary material for: Large valley polarization and the valley-dependent Hall effect in a Janus TiTeBr monolayer
Source: Royal Society of Chemistry journal article supplement (doi:10.1039/d4cp00318g), 2024-01-01
Supplement: d4cp00318g1.pdf [file d4cp00318g1.pdf]

## Supplementary Materials for “Large valley polarization and valley-dependent Hall effect in TiTeBr monolayer”

Bingwen Su,<sup>1,\*</sup> Xiao Peng,<sup>1</sup> Zhibo Yan,<sup>1</sup> Lin Lin,<sup>1,2</sup> Xiaokun Huang,<sup>3</sup> and Jun-Ming Liu<sup>1</sup>

<sup>1</sup>*Laboratory of Solid State Microstructures and Department of Physics, Nanjing University, Nanjing 210093, China*

<sup>2</sup>*Department of Applied Physics, College of Science, Nanjing Forestry University, Nanjing 210037, China*

<sup>3</sup>*School of Materials Science and Engineering, Jingdezhen Ceramic Institute, Jingdezhen 333001, China*

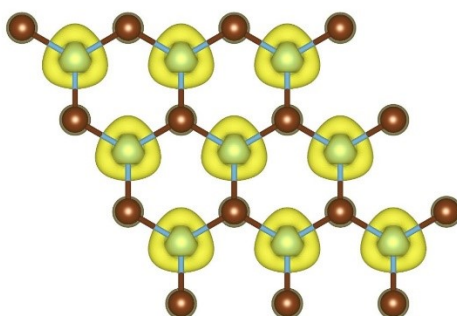

Fig. S1. Spin-polarized charge density of TiTeBr monolayer.

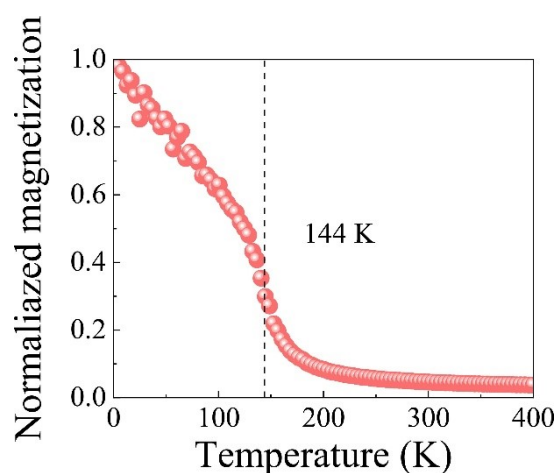

Fig. S2. Normalized magnetic moment as a function of temperature by Monte carlo

---

\* Corresponding author: [bwsu@smail.nju.edu.cn](mailto:bwsu@smail.nju.edu.cn)

simulations for TiTeBr monolayer at 5% tensile strain.

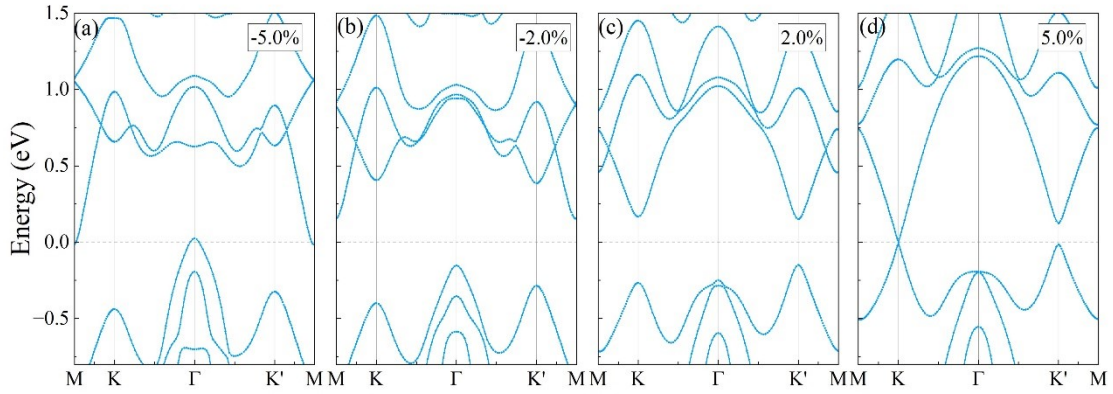

Fig. S3. Band structure of TiTeBr monolayer at (a) -5%, (b) -2%, (c) 2%, and (d) 5% strain. The magnetization is set along the +z direction.

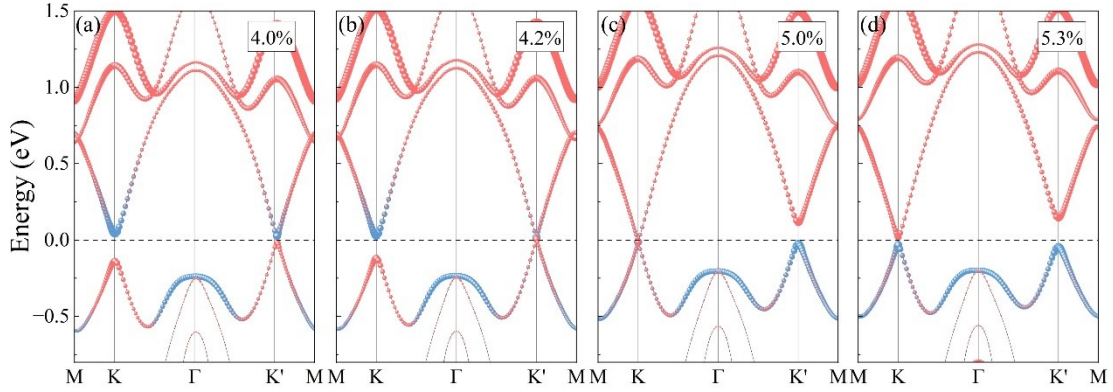

Fig. S4. Orbital-resolved band structure of TiTeBr monolayer at (a) 4.0%, (b) 4.2%, (c) 5.0% and (d) 5.3% tensile strain. The magnetization is set along the +z direction. Red and blue ball represent the  $E(d_{xy}, d_{x^2-y^2})$  orbital and  $A_1(d_z^2)$  orbital, respectively.

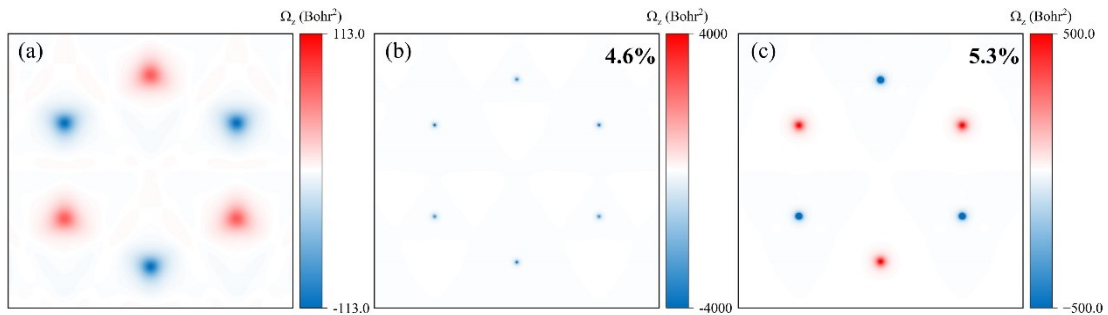

Fig. S5. Berry curvature of TiTeBr monolayer at different tensile strain. (a) is the no strain case. (b) and (c) correspond to 4.6% and 5.3% strain, respectively.

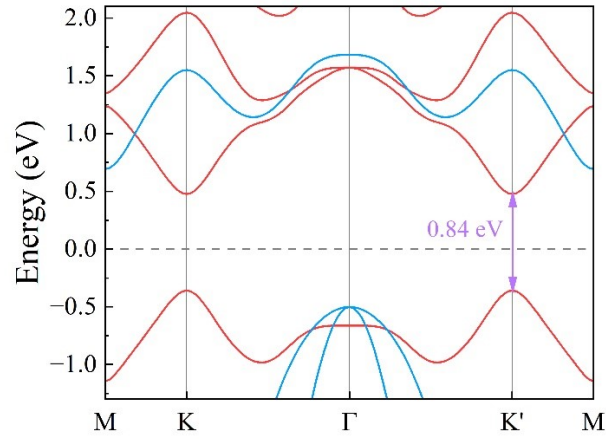

Fig. S6. Spin-resolved band structure of TiTeBr monolayer without SOC at the HSE06 level. Red and blue lines represent the spin-up and spin-down channel, respectively.

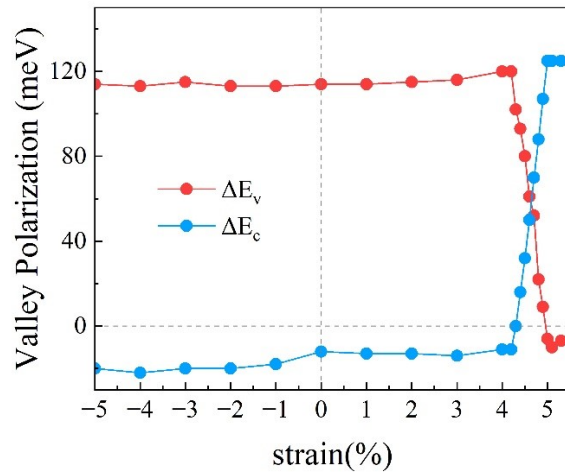

Fig. S7. Valley polarization of TiTeBr monolayer at different strain. Red and blue lines represent the valley polarization of the valence band and the conduction band, respectively.
